# Supplementary figures and images for: The NFκB-inducing kinase is essential for the developmental programming of skin-resident and IL-17-producing γδ T cells
Source: eLife journal article supplement (doi:10.7554/elife.10087), 2015-12-05

Figure 2 Supplement 1

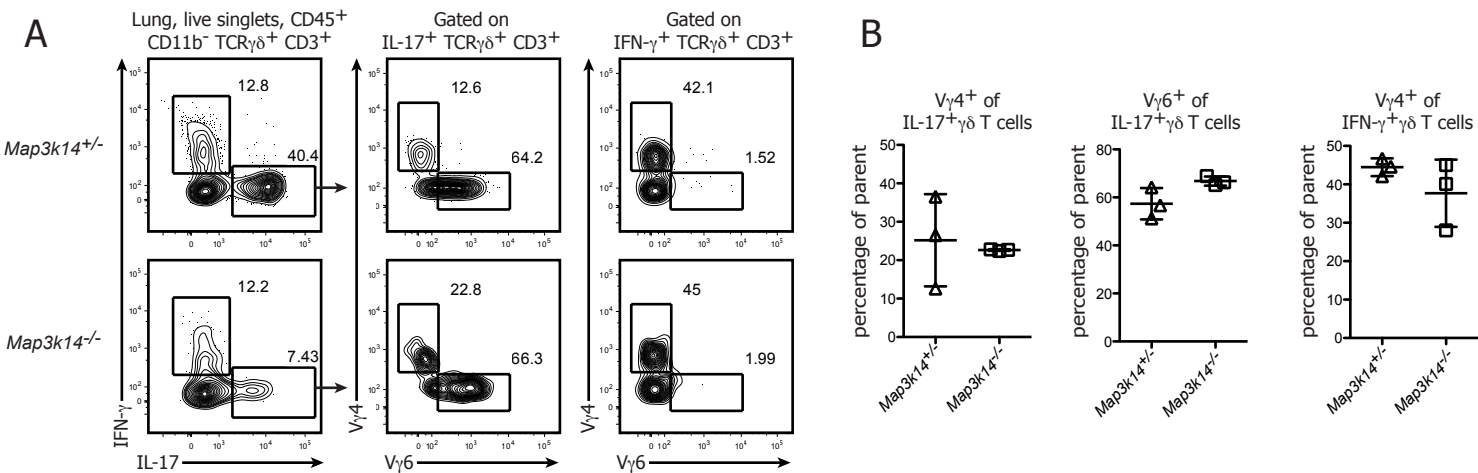

Supplement: supp [file elife-10087-supp-v1.zip]

Figure 1 Supplement 1

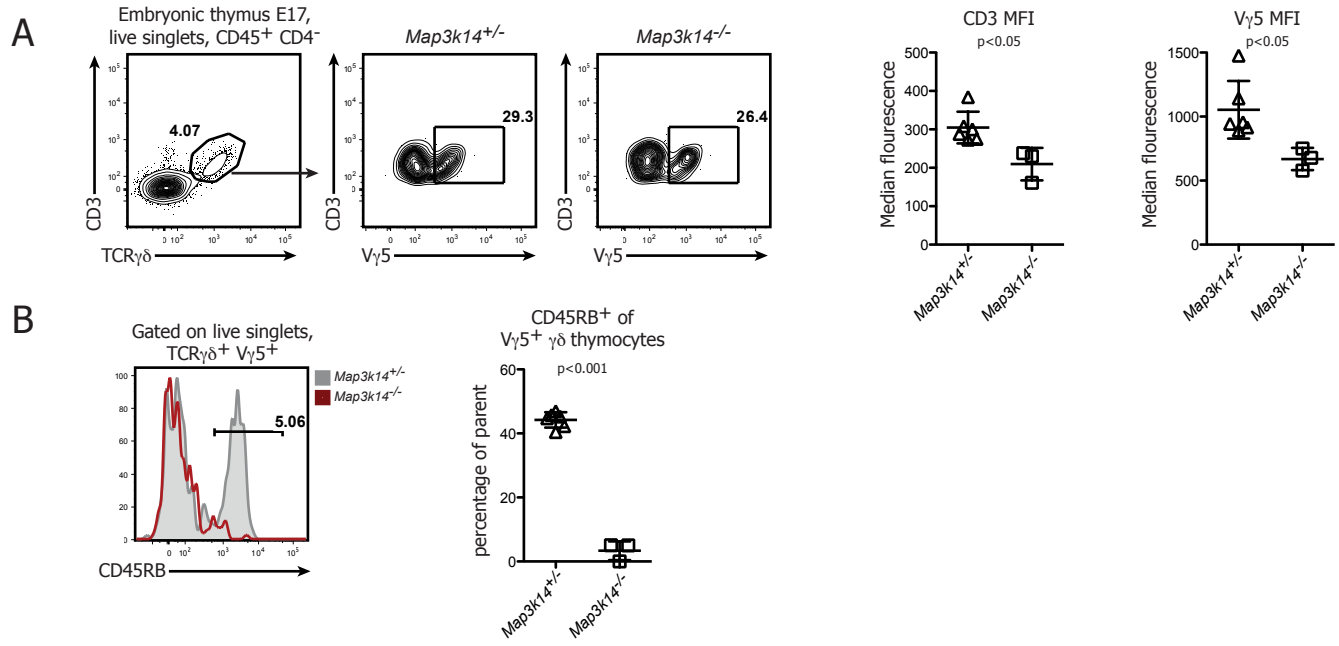

Supplement: supp [file elife-10087-supp-v1.zip]

Figure 4 Supplement 1

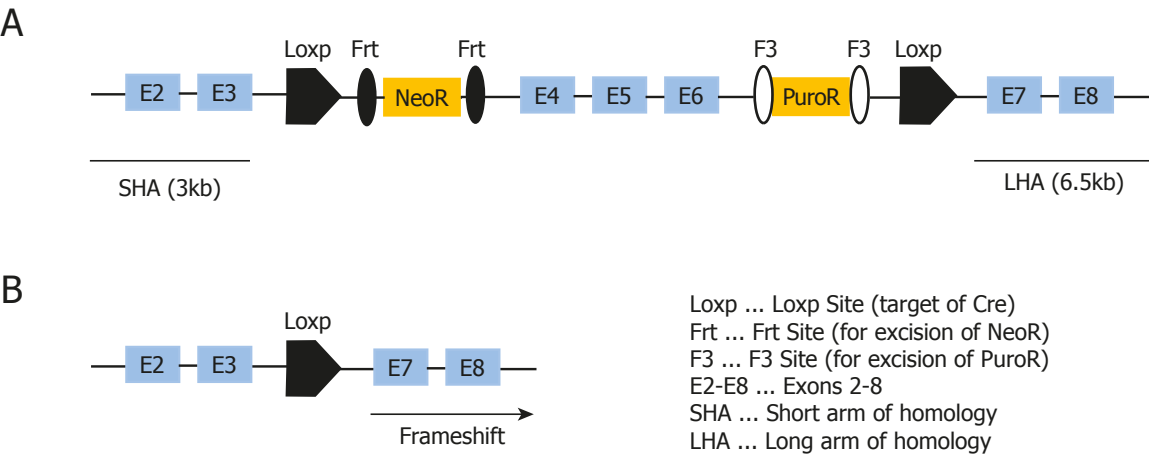

Supplement: supp [file elife-10087-supp-v1.zip]
